# Supplementary material for: One-step polyol synthesis of Rh-on-Pd bimetallic nanodendrites and their electrocatalytic properties for ethanoloxidation in alkaline media
Source: Royal Society of Chemistry journal article supplement (doi:10.1039/c2ta00725h), 2012-10-30
Supplement: c2ta00725h.pdf [file c2ta00725h.pdf]

Table S1. Onset potentials, peak current densities and  $j_{\text{f}}/j_{\text{b}}$  ratios of Pd/C and Rh-on-Pd/C catalysts with different Pd/Rh ratios during the CV tests

| Nominal composition | $E_{\text{onset}}$ (V) | $j_{\text{peak}}$ (mA mg <sup>-1</sup> ) | $j_{\text{f}}/j_{\text{b}}$ ratio |
|---------------------|------------------------|------------------------------------------|-----------------------------------|
| Pd/C                | -0.55                  | 102.8                                    | 0.7                               |
| Rh-on-Pd (7:1)/C    | -0.60                  | 55.6                                     | 1.2                               |
| Rh-on-Pd (5:1)/C    | -0.61                  | 40.0                                     | 1.4                               |
| Rh-on-Pd (3:1)/C    | -0.63                  | 39.7                                     | 2.2                               |
| Rh-on-Pd (1:1)/C    | -0.66                  | 30.1                                     | 2.7                               |

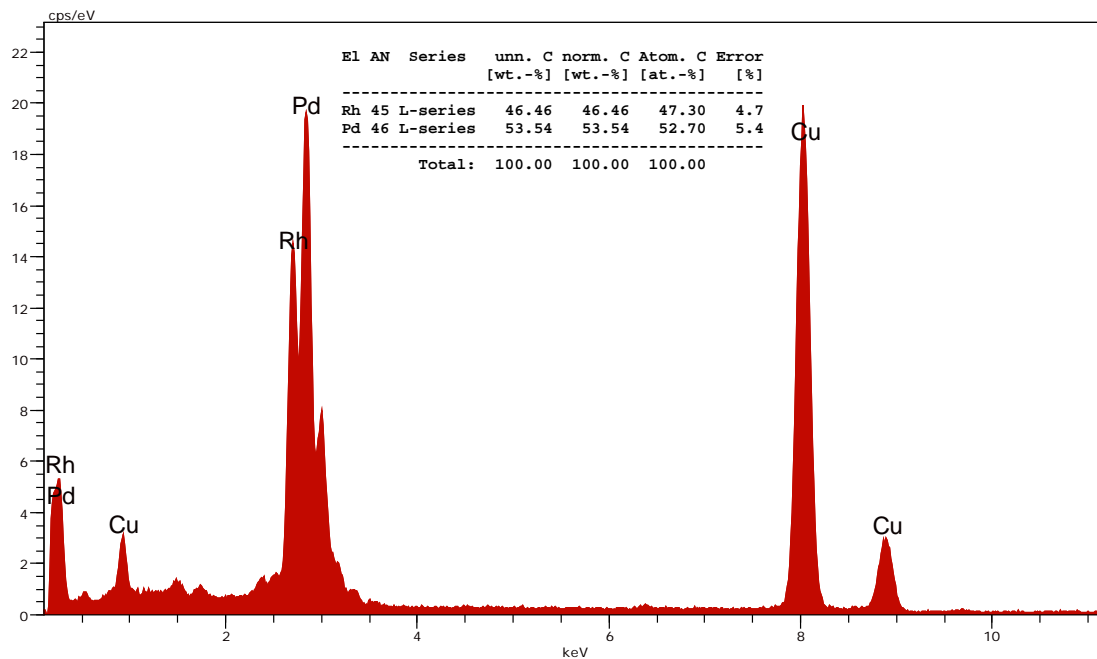

Figure S1 EDS spectrum of Rh-on-Pd (1:1) bimetallic nanodendrites in Fig. 1a

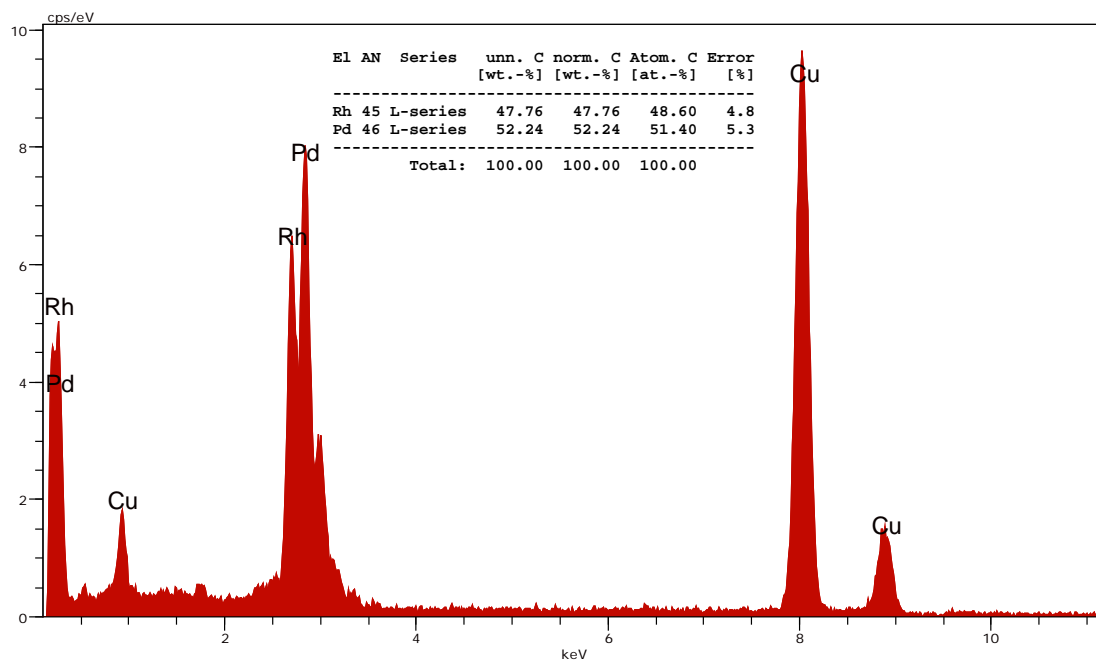

Figure S2 EDS spectrum of a single Rh-on-Pd (1:1) bimetallic nanodendrite in Fig. 1b

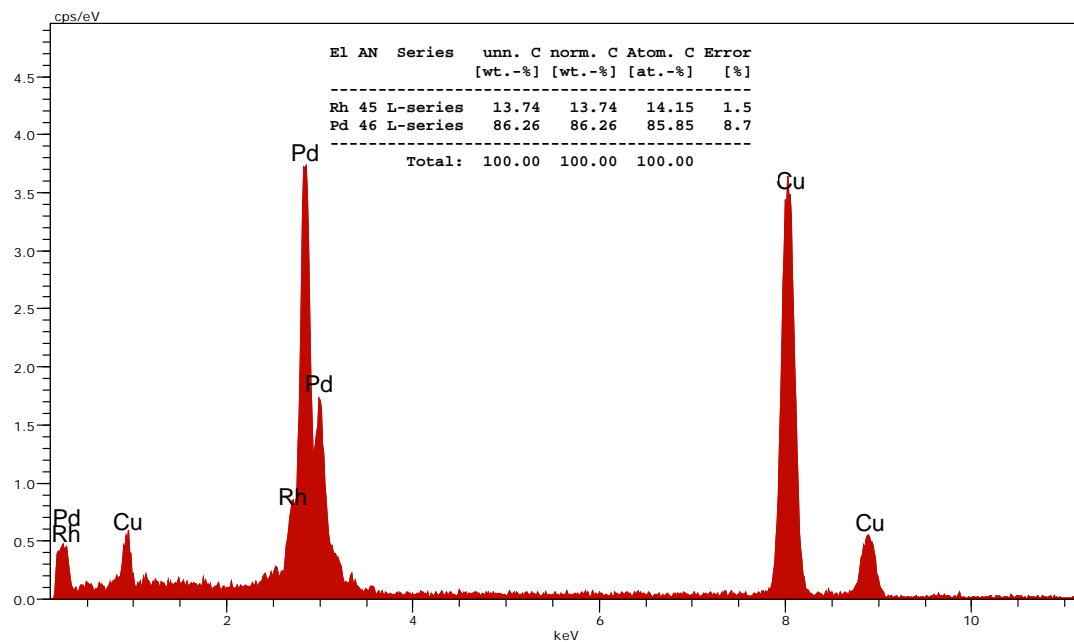

Figure S3 EDS spectrum of the Circle A region in Fig. 1b

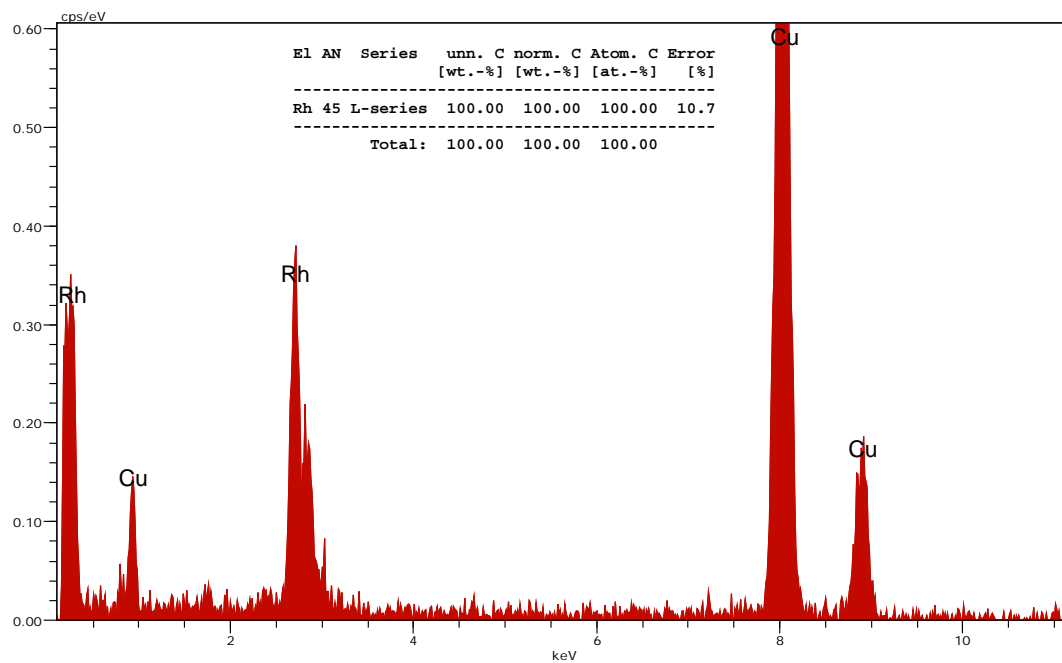

Figure S4 EDS spectrum of the Circle B region in Fig. 1b

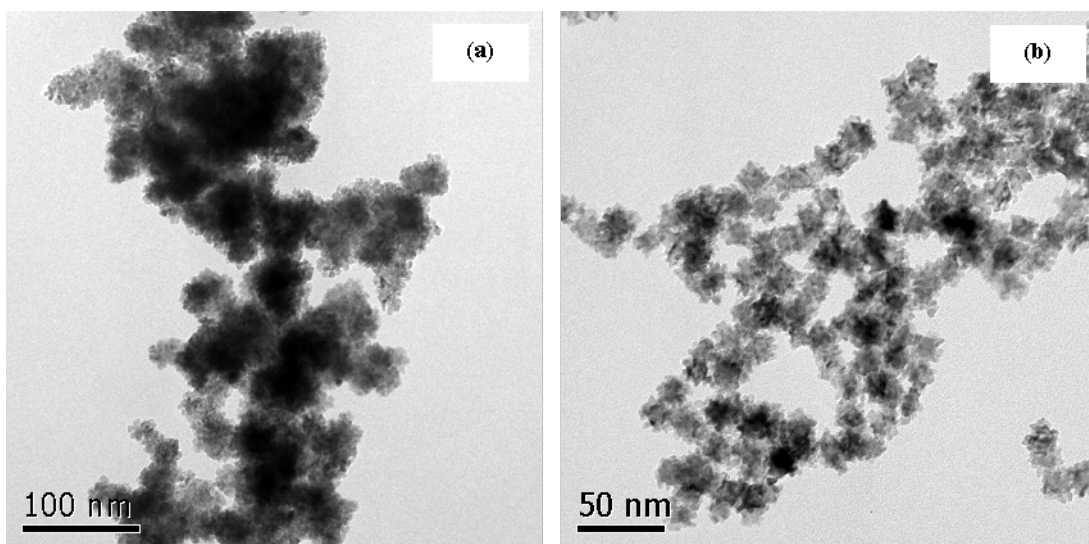

Figure S5 TEM images of Rh-on-Pd (1:1) bimetallic nanodendrites with no structure-directing agent (a) and by replacing CTAB with CTAC (b).

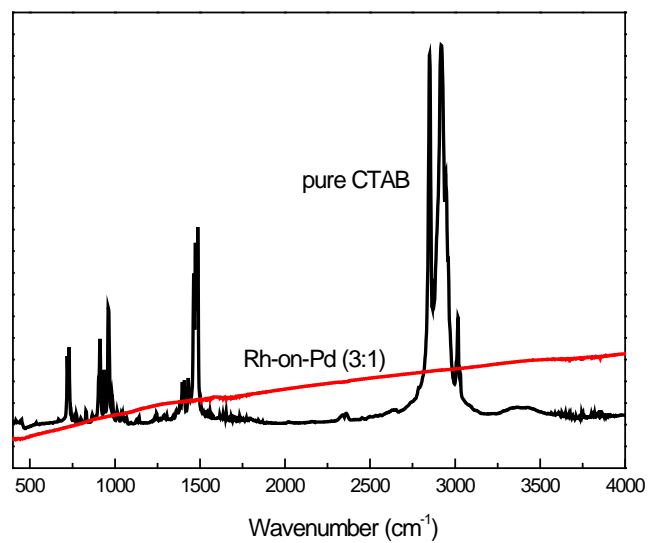

Figure S6 FT-IR spectra of pure CTAB and Rh-on-Pd (3:1) bimetallic nanodendrites after washing

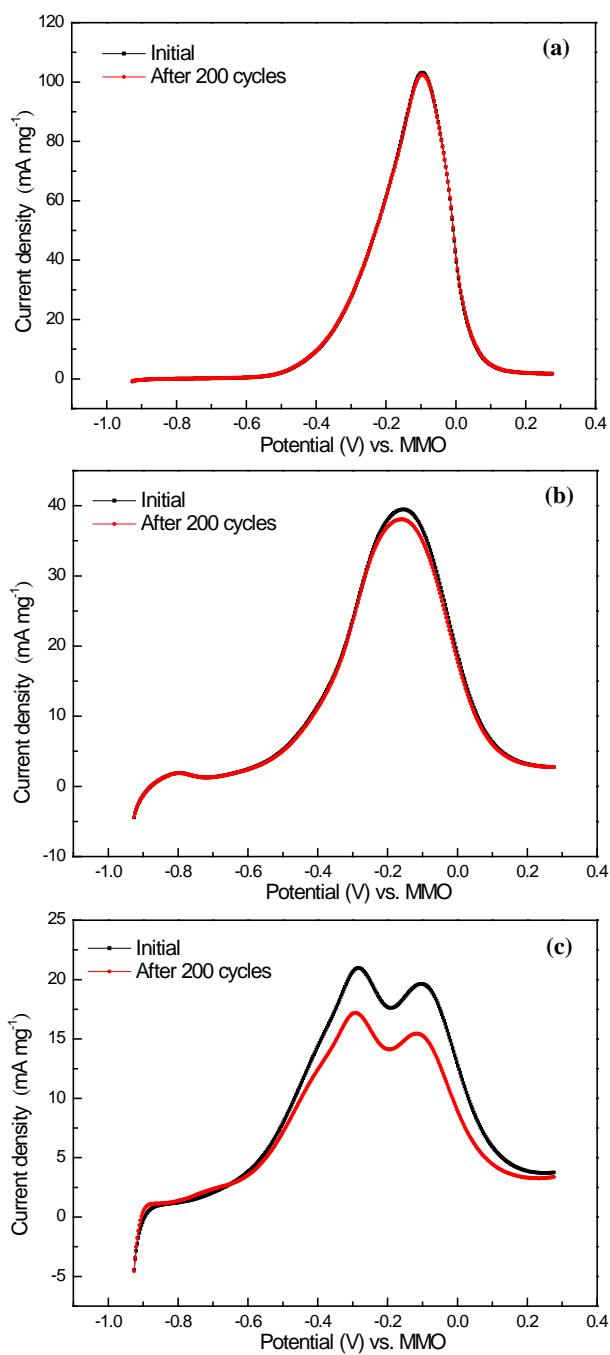

Figure S7 Positive-going CV curves of the EOR on Pd/C (a), Rh-on-Pd (3:1)/C (b) and Rh/C (c) catalysts before and after 200 cycles. (1.0 M KOH + 1.0 M ethanol; scan rate: 50 mV s<sup>-1</sup>)
